# Supplementary material for: Long-term cardiometabolic morbidity in young adults with classic 21-hydroxylase deficiency congenital adrenal hyperplasia
Source: PubMed Central journal article supplement (PMC10199864; doi:10.1007/s12020-023-03330-w), 2023-03-01
Supplement: 12020_2023_3330_MOESM1_ESM.pdf [file 12020_2023_3330_MOESM1_ESM.pdf]

**Supplementary Table** List of questions and possible answers asked in the survey of current practice for assessing the presence of adverse cardiometabolic comorbidities

| <b>Question</b>                                                                  | <b>Responses available</b>                                                                                                                                                               | <b>Response type</b>                                                                  |
|----------------------------------------------------------------------------------|------------------------------------------------------------------------------------------------------------------------------------------------------------------------------------------|---------------------------------------------------------------------------------------|
| <i>Clinician details</i>                                                         |                                                                                                                                                                                          | Free text                                                                             |
| Clinician name                                                                   |                                                                                                                                                                                          |                                                                                       |
| Centre name                                                                      |                                                                                                                                                                                          |                                                                                       |
| e-mail                                                                           |                                                                                                                                                                                          |                                                                                       |
| <i>In the case of a patient who is aged 18 years or over:</i>                    |                                                                                                                                                                                          |                                                                                       |
| Do you screen patients with CAH for abnormal glucose homeostasis?                | Yes/No                                                                                                                                                                                   | Yes/No                                                                                |
| What methods do you use to screen for abnormal glucose homestasis and how often? | Random plasma glucose<br>Fasting plasma glucose<br>Fasting plasma insulin<br>HOMA index<br>Insulin Resistance Index (IRI)<br>2 h blood glucose (OGTT)<br>Hb1Ac<br>Other (please specify) | Select all responses that apply and specify how often the method is used in free text |
| Do you screen patients with CAH for hyperlipidaemia?                             | Yes/No                                                                                                                                                                                   | Yes/No                                                                                |
| What methods do you use to screen for hyperlipidaemia and how often?             | Fasting total cholesterol<br>Fasting LDL cholesterol<br>Fasting HDL cholesterol<br>Fasting triglycerides<br>Other (please specify)                                                       | Select all responses that apply and specify how often the method is used in free text |
| Do you screen patients with CAH for hypertension?                                | Yes/No                                                                                                                                                                                   | Yes/No                                                                                |
| What methods do you use to screen for hypertension and how often?                | Systolic and diastolic BP<br>24 h BP measurement<br>Nocturnal BP measurement<br>Other (please specify)                                                                                   | Select all responses that apply and specify how often the method is used in free text |

|                                                                             |                                                                                     |                                                                                       |
|-----------------------------------------------------------------------------|-------------------------------------------------------------------------------------|---------------------------------------------------------------------------------------|
| Do you screen patients with CAH for cardiovascular disease?                 | Yes/No                                                                              | Yes/No                                                                                |
| What methods do you use to screen for cardiovascular disease and how often? | Stress test<br>Cardiac USS<br>Cardiac MRI<br>Other (please specify)                 | Select all responses that apply and specify how often the method is used in free text |
| Do you screen patients with CAH for obesity?                                | Yes/No                                                                              | Yes/No                                                                                |
| What methods do you use to screen for obesity and how often?                | Weight<br>BMI<br>Waist circumference<br>Hip circumference<br>Other (please specify) | Select all responses that apply and specify how often the method is used in free text |
| Do you screen patients with CAH for osteoporosis?                           | Yes/No                                                                              | Yes/No                                                                                |
| What methods do you use to screen for osteoporosis and how often?           | Dual X-ray absorptiometry (DEXA)<br>Other (please specify)                          | Select all responses that apply and specify how often the method is used in free text |

CAH: Congenital Adrenal Hyperplasia; HOMA: Homeostasis Model Assessment of insulin resistance; OGTT: oral glucose tolerance test; LDL: low density lipoprotein; HDL: high density lipoprotein; BP: blood pressure; USS: ultrasound scan; MRI: magnetic resonance imaging; BMI: body mass index; I-CAH: international congenital adrenal hyperplasia registry
